# Supplementary material for: Characterization of Olive Oil Phenolic Extracts and Their Effects on the Aggregation of the Alzheimer’s Amyloid-β Peptide and Tau
Source: PubMed Central journal article supplement (PMC11292642; doi:10.1021/acsomega.4c01281), 2024-07-17
Supplement: ao4c01281_si_001.pdf [file ao4c01281_si_001.pdf]

## Supplementary Information for

### Characterization of olive oil phenolic extracts and their effects on the aggregation of the Alzheimer's amyloid- $\beta$ peptide and tau

Bakri Alaziqi,<sup>a,b</sup> Liam Beckitt,<sup>a</sup> David J. Townsend,<sup>a</sup> Jasmine Morgan,<sup>c</sup> Rebecca Price,<sup>d</sup> Alana Maerivoet,<sup>d</sup> Jillian Madine,<sup>d</sup> David Rochester,<sup>a</sup> Geoffrey Akien,<sup>a</sup> & David A. Middleton.\*<sup>a</sup>

<sup>a</sup>Department of Chemistry, Lancaster University, Lancaster, LA1 4YB, United Kingdom

<sup>b</sup>Department of Chemistry, University College in Al-Qunfudah, Umm Al-Qura University, 1109 Makkah Al-Mukarramah, Saudi Arabia

<sup>c</sup>Department of Biology, Edge Hill University, Ormskirk, L39 4QP, United Kingdom

<sup>d</sup>Department of Biochemistry, Cell and Systems Biology, Institute of Systems, Molecular and Integrative Biology, University of Liverpool, L69 7ZB, United Kingdom

**\*Corresponding Author:** [d.middleton@lancaster.ac.uk](mailto:d.middleton@lancaster.ac.uk)

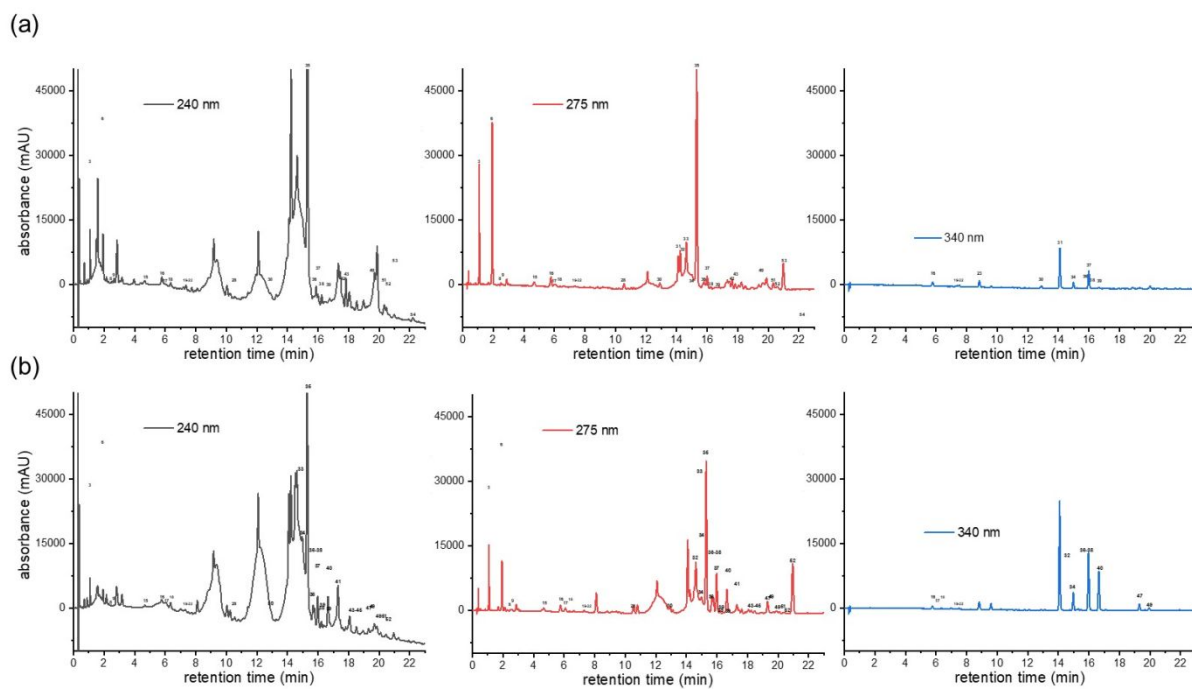

**Figure S1.** Alternative representation of the reverse-phase HPLC chromatograms from Figure 1b.

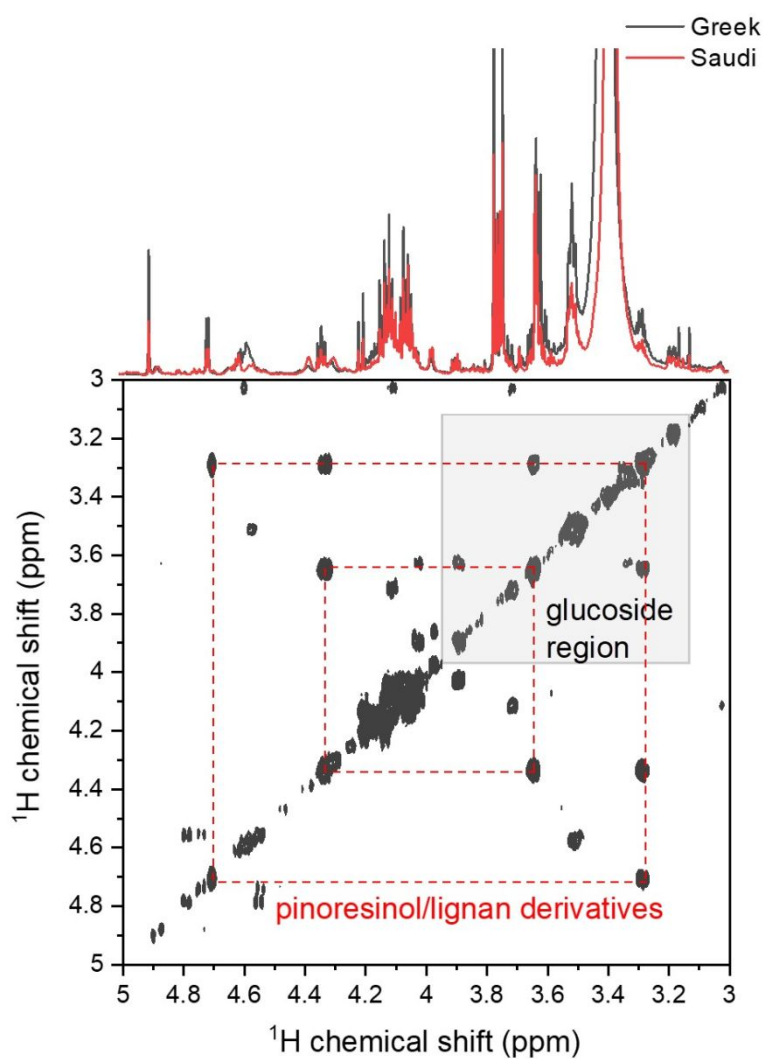

**Figure S2.** Region of the  $^1\text{H}$  COSY spectrum of Greek EVOO extract and (top) the corresponding 1D spectrum overlaid with the spectrum of Saudi EVOO extract.

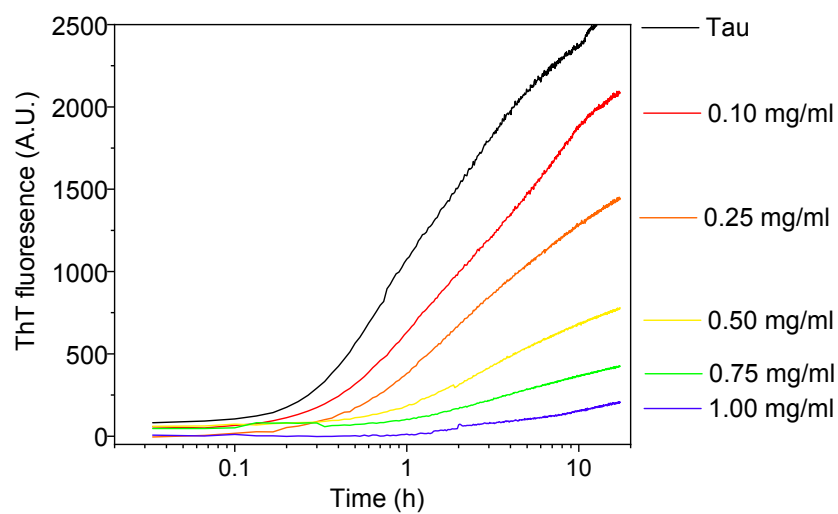

**Figure S3.** Reproduction of Figure 3 (a) of the main text on a logarithmic time scale.

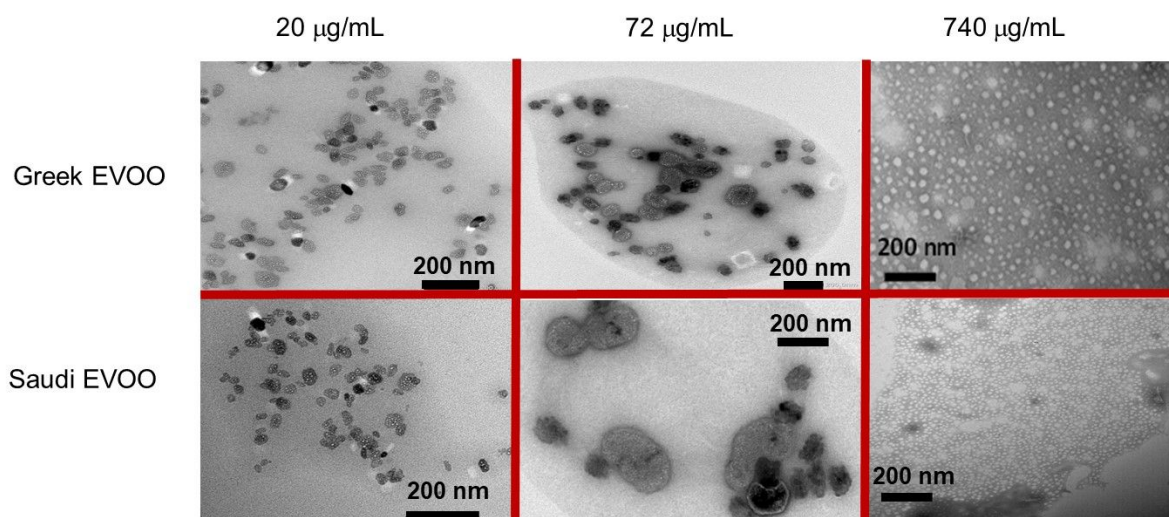

**Figure S4.** Soluble oligomers of Aβ40 isolated in the supernatant after centrifugation, from pre-formed fibrils treated with EVOO extracts at 3 concentrations.

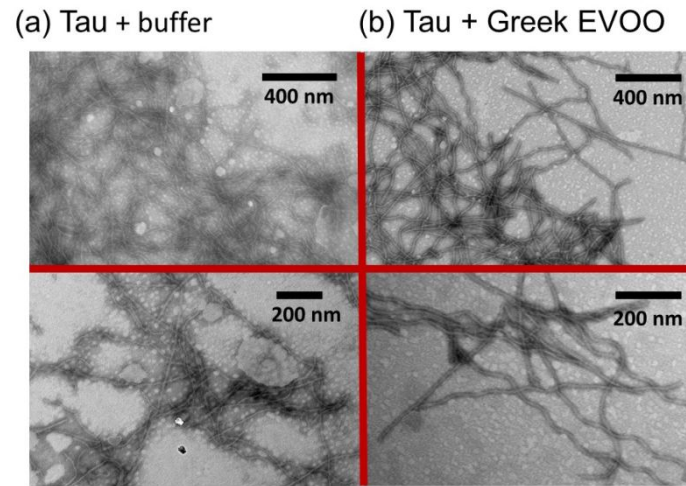

**Figure S5.** Negative-stain TEM images of tau filaments formed alone after 3 d (a) and after addition of 500  $\mu\text{g/mL}$  Greek EVOO extract (b).

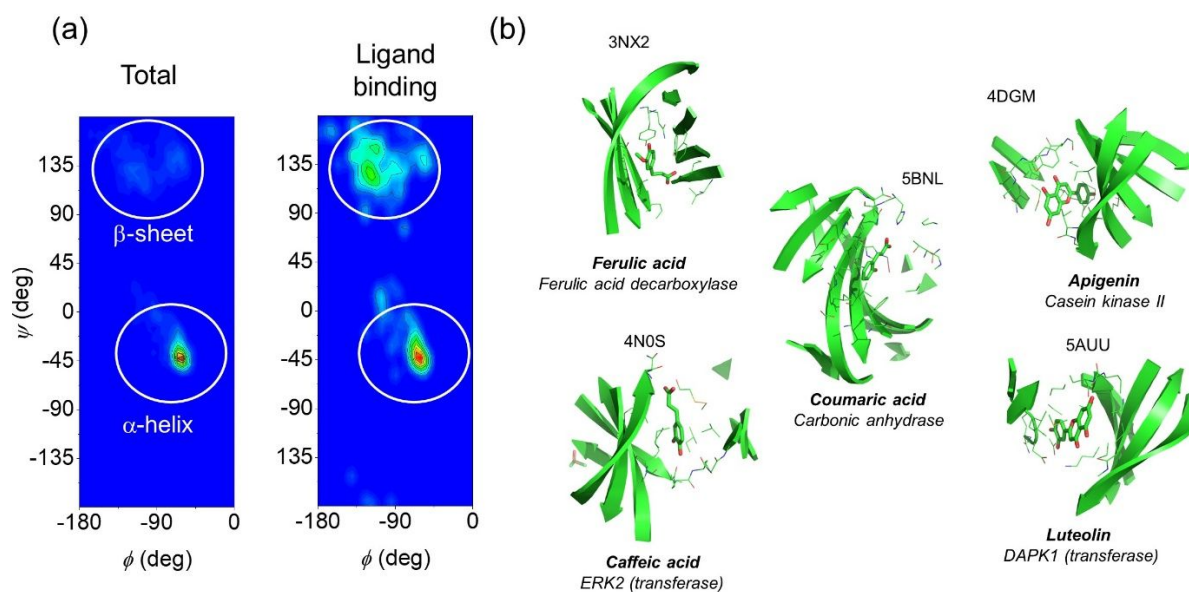

**Figure S6.** Computational analysis of phenolic-binding proteins. (a) Secondary structure content of unrelated phenolic binding proteins (76 in total) defined according to backbone  $\phi$  and  $\psi$  angles. Left: summary of all residues in the proteins. Right: Only residues  $\leq 5 \text{ \AA}$  from one or more sites in the phenol ligand. Structural coordinates were selected of all proteins in the PDB containing the following phenolic compounds: apigenin, caffeic acid, coumaric acid, ferulic acid, luteolin, naringenin, pinoresinol, quercetin, tyrosol, vanillic acid. (b) Examples of phenolic binding sites in selected protein structures from the PDB.

**Table S1.** Retention time, linearity range and regression equation of detected phenolic compounds in Greek and Saudi EVOOs by HPLC.

| Phenolic Compound       | Retention time (min) | Linearity range ug/ml | R     | R <sup>2</sup> | Regression equation |
|-------------------------|----------------------|-----------------------|-------|----------------|---------------------|
| Hydroxytyrosol          | 1.0                  | 1-30                  | 0.999 | 0.999          | 4494.9x – 243.216   |
| Tyrosol                 | 1.9                  | 1-30                  | 0.999 | 0.999          | 6562.8x – 352.919   |
| Vanillic acid           | 2.9                  | 0.05-0.5              | 0.997 | 0.994          | 17900.0x + 307.488  |
| Caffeic acid            | 3.0                  | 0.05-0.5              | 0.987 | 0.974          | 25926.8x + 222.960  |
| <i>p</i> -Coumaric acid | 5.7                  | 0.05-0.5              | 0.997 | 0.995          | 36462.7x + 235.056  |
| Ferulic acid            | 7.4                  | 0.05-0.5              | 0.999 | 0.999          | 22615.9x – 35.2171  |
| Oleuropein              | 13.0                 | 1-30                  | 0.999 | 0.999          | 918.1x – 132.863    |
| Luteolin                | 14.1                 | 1-30                  | 0.999 | 0.999          | 34492.4x – 4,138.65 |
| (+)-Pinoresinol         | 14.6                 | 1-30                  | 0.998 | 0.997          | 4384.1x – 1,434.26  |
| Naringenin              | 15.3                 | 1-30                  | 0.999 | 0.999          | 22711.6x – 3,923.09 |
| Apigenin                | 16.0                 | 0.1-20                | 0.999 | 0.998          | 2,442.6x + 3,054.90 |

R: The coefficient of correlation.

R<sup>2</sup>: The coefficient of determination.



**Table S2.** Summary of the HPLC analysis of EVOO compound binding (20  $\mu\text{g/mL}$  Saudi extract) to A $\beta$ 40 fibrils (20  $\mu\text{M}$  monomer equivalent).

| Retention time<br>(min) | Compound        | Normalized peak<br>intensity <sup>a</sup> |         | % bound |
|-------------------------|-----------------|-------------------------------------------|---------|---------|
|                         |                 | -fibril                                   | +fibril |         |
| 1.0                     | Hydroxytyrosol  | 21.9                                      | 21.7    | 1       |
| 1.2                     | Unknown         | 7.9                                       | 1.6     | 80      |
| 1.7                     | Unknown         | 2.0                                       | 0.0     | 100     |
| 1.9                     | Tyrosol         | 37.1                                      | 31.5    | 15      |
| 2.9                     | Vanillic acid   | 2.9                                       | 0.0     | 100     |
| 3.0                     | Caffeic acid    | 2.4                                       | 0.0     | 100     |
| 8.1                     | Unknown         | 9.6                                       | 11.6    | 0       |
| 8.9                     | Unknown         | 2.1                                       | 0.0     | 100     |
| 9.2                     | Unknown         | 65.9                                      | 9.7     | 85      |
| 9.4                     | Unknown         | 100.0                                     | 0.0     | 100     |
| 12.1                    | Unknown         | 15.9                                      | 15.9    | 0       |
| 14.1                    | Luteolin        | 16.1                                      | 4.1     | 74      |
| 14.3                    | Unknown         | 6.0                                       | 5.3     | 12      |
| 14.5                    | Unknown         | 24.2                                      | 15.4    | 36      |
| 14.6                    | (+)-Pinoresinol | 15.9                                      | 13.9    | 13      |
| 15.0                    | Unknown         | 4.3                                       | 3.4     | 21      |
| 15.3                    | Naringenin      | 40.7                                      | 41.7    | 0       |
| 15.7                    | Unknown         | 5.0                                       | 4.4     | 12      |
| 15.8                    | Unknown         | 4.5                                       | 2.7     | 39      |
| 16.0                    | Apigenin        | 13.1                                      | 4.7     | 64      |
| 16.7                    | Unknown         | 7.5                                       | 4.0     | 47      |
| 19.4                    | Unknown         | 9.4                                       | 0.0     | 100     |
| 21.0                    | Unknown         | 31.6                                      | 8.5     | 73      |
| 22.6                    | Unknown         | 28.1                                      | 23.6    | 16      |

<sup>a</sup>Normalized to the maximum peak intensity in the absence of fibrils.

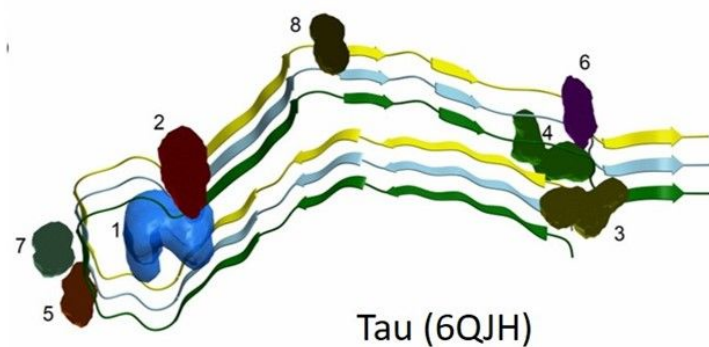

**Table S3:** Output from the ICM Pro (Molsoft) pocket finder algorithm for 6QJH (tau).

| No. | Volume<br>(Å <sup>3</sup> ) | Hydrophobicity | Buriedness | DLID<br>Merck's<br>Druggable | Radius |
|-----|-----------------------------|----------------|------------|------------------------------|--------|
| 1   | 749                         | 0.656          | 0.892      | 1.194                        | 5.634  |
| 2   | 341                         | 0.570          | 0.793      | 0.026                        | 4.337  |
| 3   | 191                         | 0.481          | 0.765      | -0.714                       | 3.573  |
| 4   | 131                         | 0.427          | 0.600      | -1.761                       | 3.153  |
| 5   | 130                         | 0.731          | 0.798      | -0.298                       | 3.146  |
| 6   | 114                         | 0.496          | 0.781      | -0.992                       | 3.012  |
| 7   | 110                         | 0.519          | 0.681      | -1.362                       | 2.975  |
| 8   | 106                         | 0.675          | 0.705      | -0.940                       | 2.942  |

**Table S4.** Predicted binding energies (ICM Pro, Molsoft) for compounds docked to the tau filament (PDB 6QJH). All values in kcal/mol.

| Compound                                   | Energy (kcal/mol) |        |            |          |       | Binding pocket |
|--------------------------------------------|-------------------|--------|------------|----------|-------|----------------|
|                                            | Total             | H-bond | Electrost. | H'phobic | VdW   |                |
| Hydroxy oleuropein aglycone                | -30.9             | -3.1   | -3.6       | -3.9     | -52.6 | 3              |
| Oleocanthal                                | -30.8             | -6.6   | -2.9       | -2.1     | -52.7 | 1              |
| Hydroxydecarboxymethyl oleuropein aglycone | -24.9             | -2.5   | -3.4       | -3.3     | -50.8 | 2              |
| Oleuropein aglycone (3,4-DHPEA-EA)         | -24.9             | -3.0   | -1.5       | -4.1     | -54.6 | 2              |
| Decarboxymethyl oleuropein aglycone        | -24.7             | -3.7   | -2.6       | -1.9     | -50.4 | 2              |
| Hydroxytyrosol acetate (3,4-DHPEA-AC)      | -24.6             | -1.3   | -0.6       | -2.2     | -41.2 | 6              |
| Elenolic acid                              | -22.8             | -1.1   | 0.0        | -2.3     | -42.8 | 2              |
| Tyrosol                                    | -20.9             | -2.1   | -3.2       | -1.6     | -31.3 | 4              |
| Coumaric acid                              | -20.4             | -1.6   | -1.7       | -1.4     | -36.8 | 3              |
| Caffeic acid                               | -19.9             | -2.2   | -2.1       | -1.7     | -36.9 | 1              |
| Hydroxytyrosol                             | -19.2             | -0.3   | -1.9       | -1.7     | -33.8 | 1              |
| Cinnamic acid                              | -19.1             | -1.4   | -1.3       | -1.5     | -35.6 | 2              |
| Apigenin                                   | -11.9             | -1.8   | -0.2       | -3.0     | -47.3 | 2              |
| Vanillic Acid                              | -5.3              | -1.3   | -1.5       | -1.4     | -34.1 | 2              |
| Luteolin                                   | -3.3              | -3.2   | -3.2       | -1.1     | -38.7 | 2              |
| Ferulic acid                               | -2.2              | -3.4   | -5.4       | -2.1     | -24.5 | 4              |
| Ouinic Acid                                | 7.0               | -8.5   | -7.4       | 0.3      | -20.3 | 2              |
| Tyrosol Glucoside                          | 9.2               | -6.9   | -6.5       | -0.3     | -35.0 | 3              |
| Pinoresinol                                | 27.2              | -4.1   | -2.5       | -2.0     | -43.1 | 2              |
| Gibberellic acid                           | 51.0              | -2.9   | -1.6       | -1.0     | -39.9 | 2              |

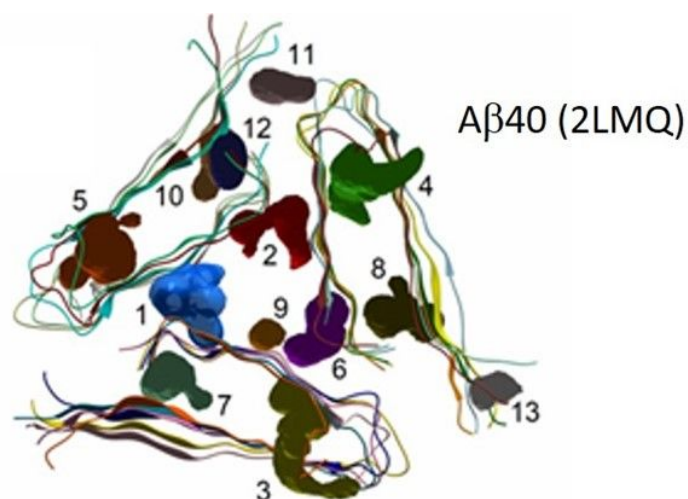

**Table S5.** Output from the ICM Pro (Molsoft) pocket finder algorithm for 2LMQ (Aβ).

| No. | Volume (Å <sup>3</sup> ) | Hydrophobicity <sup>1</sup> | Buriedness <sup>2</sup> | DLID Merck's Druggable <sup>3</sup> | Radius |
|-----|--------------------------|-----------------------------|-------------------------|-------------------------------------|--------|
| 1   | 857                      | 0.618                       | 0.682                   | 0.3793                              | 5.893  |
| 2   | 590                      | 0.741                       | 0.837                   | 0.9928                              | 5.203  |
| 3   | 571                      | 0.531                       | 0.635                   | -0.3048                             | 5.147  |
| 4   | 566                      | 0.802                       | 0.885                   | 1.289                               | 5.132  |
| 5   | 549                      | 0.617                       | 0.761                   | 0.3591                              | 5.082  |
| 6   | 533                      | 0.613                       | 0.743                   | 0.2576                              | 5.031  |
| 7   | 342                      | 0.615                       | 0.879                   | 0.4711                              | 4.342  |
| 8   | 308                      | 0.541                       | 0.786                   | -0.1437                             | 4.193  |
| 9   | 301                      | 0.585                       | 0.798                   | -0.01011                            | 4.161  |
| 10  | 212                      | 0.561                       | 0.596                   | -1.119                              | 3.703  |
| 11  | 170                      | 0.470                       | 0.715                   | -1.018                              | 3.442  |
| 12  | 130                      | 0.771                       | 0.985                   | 0.527                               | 3.144  |
| 13  | 104                      | 0.726                       | 0.859                   | -0.2306                             | 2.922  |

<sup>1</sup>Fraction of the pocket surface in contact with hydrophobic protein residues.

<sup>2</sup>Solvent accessible surface of the pocket divided the accessible surface covered by the shell. Values of 0.5 (open) to 1 (buried).

<sup>3</sup>Merck's drug like density score where >0.5 is considered druggable.

<sup>4</sup>Area of pocket / area of perfect sphere. Value of 1 is a sphere.

**Table S6.** Predicted binding energies (ICM Pro, Molsoft) for compounds docked to the amyloid beta filament (PDB 2LMQ). All values in kcal/mol.

| Compound                                   | Energy (kcal/mol) |        |            |          |       | Binding pocket |
|--------------------------------------------|-------------------|--------|------------|----------|-------|----------------|
|                                            | Total             | H-bond | Electrost. | H'phobic | VdW   |                |
| Hydroxy oleuropein aglycone                | -57.1             | -4.4   | -7.0       | -3.5     | -73.4 | 6              |
| Decarboxymethyl oleuropein aglycone        | -46.3             | -1.7   | -3.1       | -3.1     | -71.4 | 6              |
| Oleuropein aglycone (3, 4-DHPEA-EA)        | -45.0             | -0.1   | -1.2       | -4.9     | -81.3 | 5              |
| Hydroxydecarboxymethyl oleuropein aglycone | -44.4             | -2.7   | -4.5       | -2.4     | -71.7 | 6              |
| Oleocanthal                                | -44.2             | -2.9   | -4.3       | -2.8     | -65.5 | 6              |
| hydroxytyrosol acetate (3,4-DHPEA-AC)      | -35.7             | -1.5   | -2.8       | -1.8     | -50.7 | 6              |
| Elenolic acid                              | -31.2             | -2.3   | -1.9       | -1.7     | -47.5 | 6              |
| Tyrosol                                    | -30.6             | -4.0   | -4.0       | -0.5     | -39.1 | 6              |
| Hydroxytyrosol                             | -29.2             | -3.8   | -3.5       | -0.5     | -40.7 | 6              |
| Caffeic acid                               | -28.4             | -2.2   | -5.6       | -0.1     | -43.9 | 6              |
| Coumaric acid                              | -28.2             | -2.4   | -5.0       | -0.2     | -42.1 | 6              |
| Cinnamic acid                              | -25.2             | -0.0   | -3.2       | -1.9     | -41.3 | 5              |
| Luteolin                                   | -23.8             | -0.9   | -1.8       | -3.5     | -60.6 | 5              |
| Apigenin                                   | -23.6             | -1.2   | -4.8       | -1.3     | -57.2 | 6              |
| Ferulic acid                               | -20.4             | -2.6   | -4.0       | -0.6     | -46.0 | 6              |
| Vanillic Acid                              | -17.2             | -0.0   | -1.8       | -1.6     | -44.3 | 5              |
| Tyrosol glucoside                          | -14.3             | -4.6   | -3.2       | -1.6     | -63.4 | 6              |
| Ouinic Acid                                | -3.0              | -3.8   | -6.3       | -0.4     | -34.3 | 6              |
| Pinoresinol                                | 1.0               | -0.0   | -1.2       | -5.5     | -77.0 | 5              |
| Gibberellic acid                           | 29.0              | -1.5   | -3.4       | -4.8     | -54.4 | 1              |
